# Supplementary material for: Study of mechanical degradation of freestanding ALD Al2O3 by a hygrothermal environment and a facile protective method for environmentally stable Al2O3: toward highly reliable wearable OLEDs
Source: Royal Society of Chemistry journal article supplement (doi:10.1039/d3mh00669g), 2023-01-01
Supplement: d3mh00669g1.pdf [file d3mh00669g1.pdf]

## Supporting Information

### Study of Mechanical Degradation of Freestanding ALD Al<sub>2</sub>O<sub>3</sub> by Hygrothermal Environment and Facile Protective Method for Environmentally Stable Al<sub>2</sub>O<sub>3</sub>: Toward Highly Reliable Wearable OLEDs

*Sangmin Lee*<sup>†,1</sup>, *Yongmin Jeon*<sup>†,2</sup>, *Seung Jin Oh*<sup>1</sup>, *Sun-Woo Lee*<sup>1</sup>, *Kyung Cheol Choi*<sup>3,\*</sup> and *Taek-Soo Kim*<sup>1,\*</sup>, *Jeong Hyun Kwon*<sup>4,\*</sup>

Sangmin Lee, Seung Jin Oh, Sun-Woo Lee, Taek-Soo Kim

<sup>1</sup>Department of Mechanical Engineering, Korea Advanced Institute of Science and Technology (KAIST), 291 Daehak-ro, Yuseong-gu, Daejeon 34141, Republic of Korea

Yongmin Jeon

<sup>2</sup>Department of Biomedical Engineering, Gachon University, Seongnam 13120, Republic of Korea

Kyung Cheol Choi

<sup>3</sup>School of Electrical Engineering, Korea Advanced Institute of Science and Technology (KAIST), 291 Daehak-ro, Yuseong-gu, Daejeon 34141, Republic of Korea

Jeong Hyun Kwon

<sup>4</sup>Department of Display and Semiconductor Engineering, Sun Moon University, Choongcheongnam-do, Asan, 31460 Republic of Korea

<sup>†</sup> These authors contributed equally to this work.

E-mail: [love6539@sunmoon.ac.kr](mailto:love6539@sunmoon.ac.kr) (Jeong Hyun Kwon), [tskim1@kaist.ac.kr](mailto:tskim1@kaist.ac.kr) (Taek-Soo Kim), [kyungcc@kaist.ac.kr](mailto:kyungcc@kaist.ac.kr) (Kyung Cheol Choi)

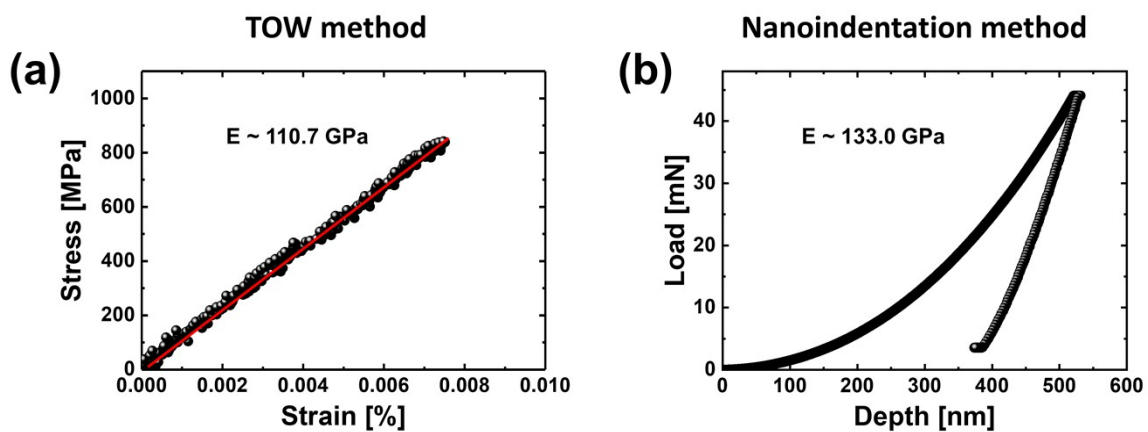

**Figure S1.** Elastic modulus of the ALD Al<sub>2</sub>O<sub>3</sub> film measured by (a) the free-standing tensile testing method and (b) nanoindentation method, respectively.

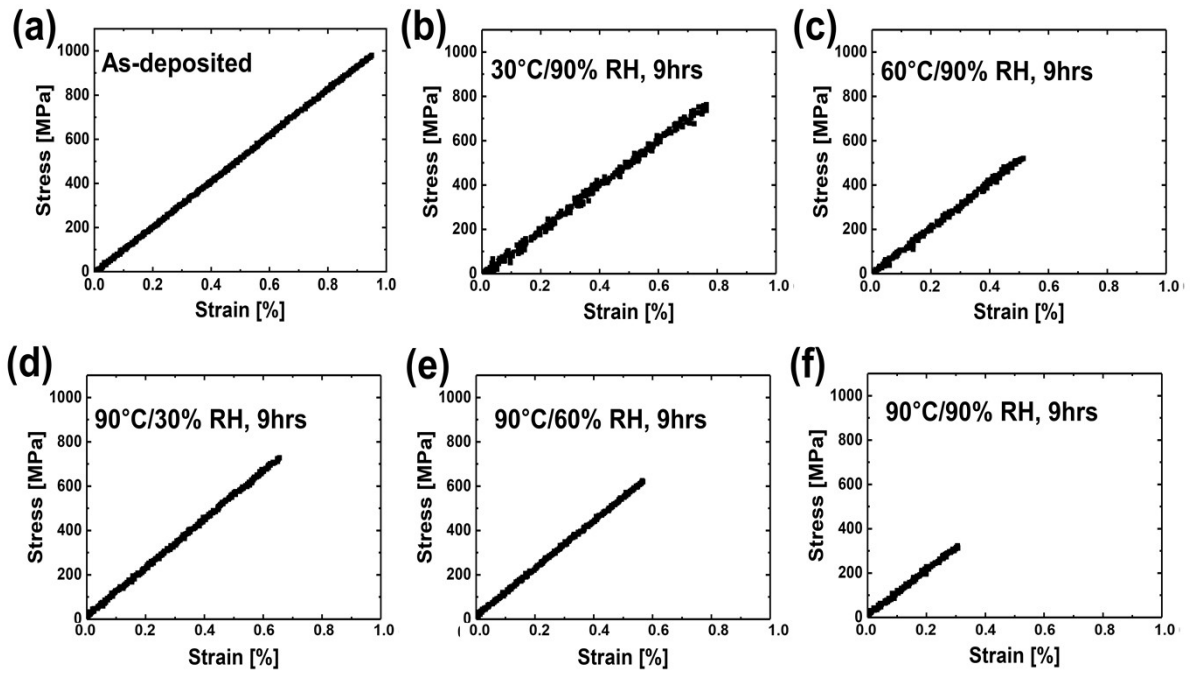

**Figure S2.** Strain-stress curves of a) as-deposited  $\text{Al}_2\text{O}_3$ , (b)  $\text{Al}_2\text{O}_3$  after exposure to  $30^\circ\text{C}/90\%$  RH, (c)  $\text{Al}_2\text{O}_3$  after exposure to  $60^\circ\text{C}/90\%$  RH, (d)  $\text{Al}_2\text{O}_3$  after exposure to  $90^\circ\text{C}/30\%$  RH, (e)  $\text{Al}_2\text{O}_3$  after exposure to  $90^\circ\text{C}/60\%$  RH, (f)  $\text{Al}_2\text{O}_3$  after exposure to  $90^\circ\text{C}/90\%$  RH for 9 h.

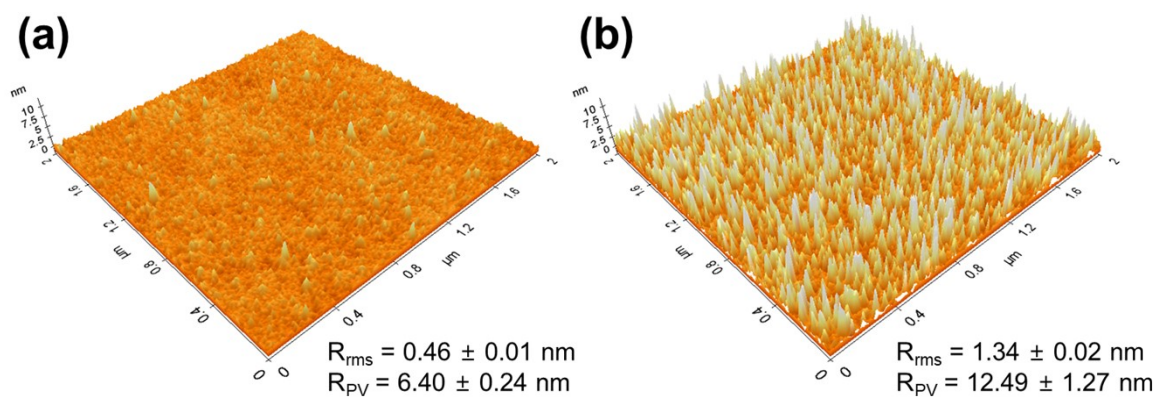

**Figure S3.** AFM images of (a) as-deposited  $\text{Al}_2\text{O}_3$  and (b)  $\text{Al}_2\text{O}_3$  exposed to  $90^\circ\text{C}/90\% \text{RH}$  for 9 h.

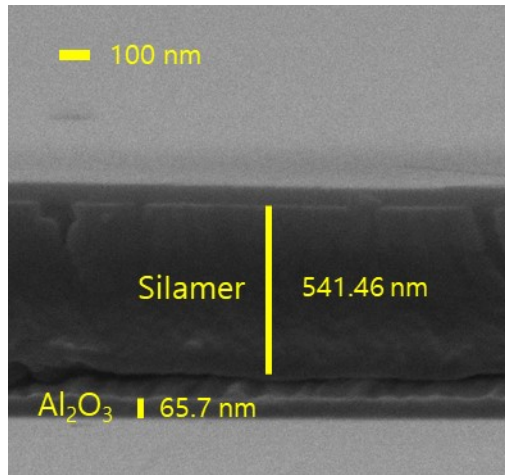

**Figure S4.** SEM cross-sectional image of the Al<sub>2</sub>O<sub>3</sub>/silamer bilayer.

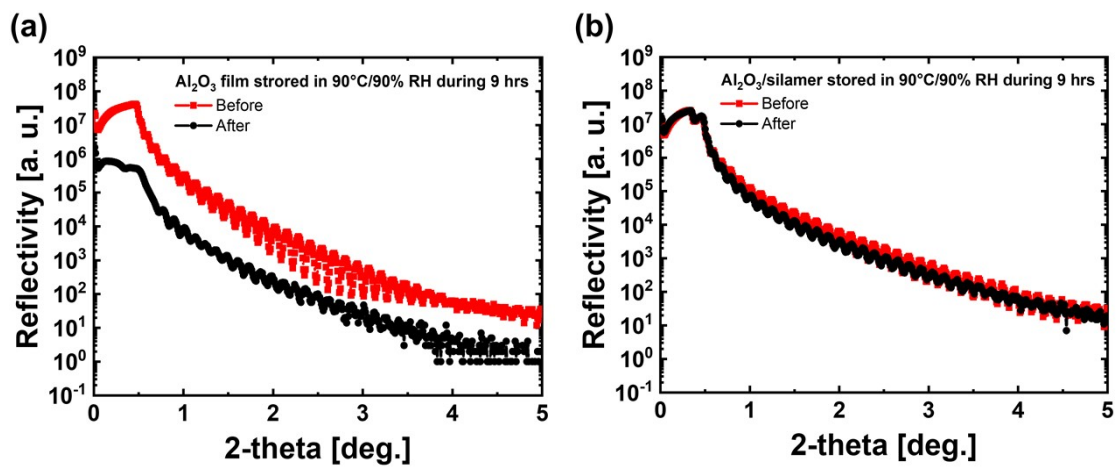

**Figure S5.** XRR measurements of (a) Al<sub>2</sub>O<sub>3</sub> single layer and (b) Al<sub>2</sub>O<sub>3</sub>/silamer bilayer before and after exposure to the environment of 90°C/90%RH for 9 h.

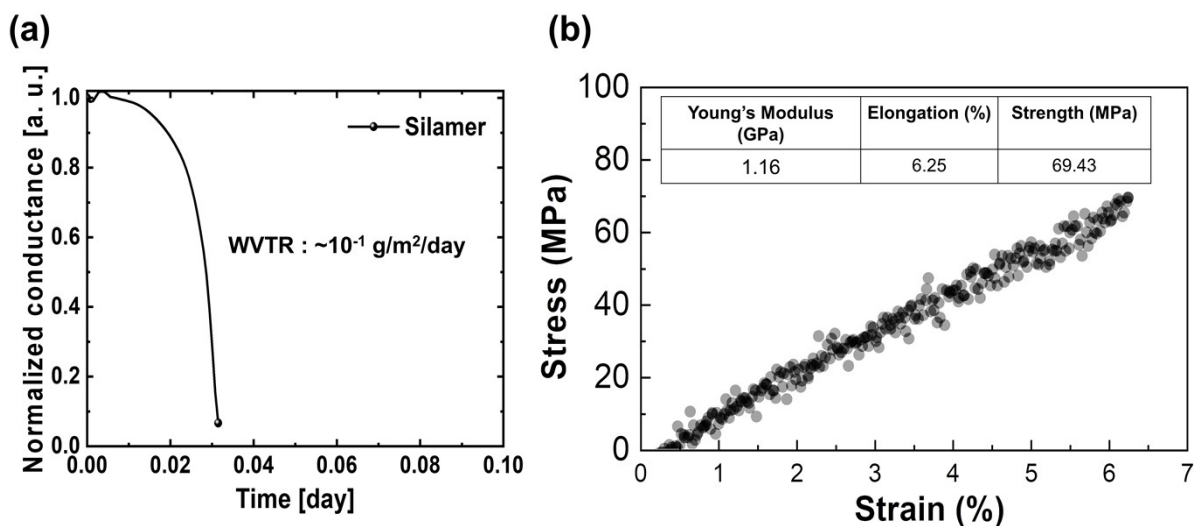

**Figure S6.** (a) Ca test result of the silamer layer obtained in 30°C/90% RH. (b) Stress-strain curve of the silamer layer measured by free-standing tensile test. Inset: Measured Young's modulus (E), elongation ( $\epsilon$ ), and strength (S) values of the free-standing silamer layer.

The ALD Al<sub>2</sub>O<sub>3</sub> film is easily degraded under harsh conditions owing to its poor environmental stability, which significantly degrades the reliability of devices and films, including Al<sub>2</sub>O<sub>3</sub> films. A silamer is a polymer with a layered SiO<sub>2</sub> chain in a mixed base of Si:glycidoxy-propyl trimethoxysilane (Si:GPTMS) and tetraethyl orthosilicate (TEOS) prepared using the sol-gel method. TEOS functions as an adhesion promoter and silane coupling agent during thermal curing after spin coating on the ALD Al<sub>2</sub>O<sub>3</sub> film.

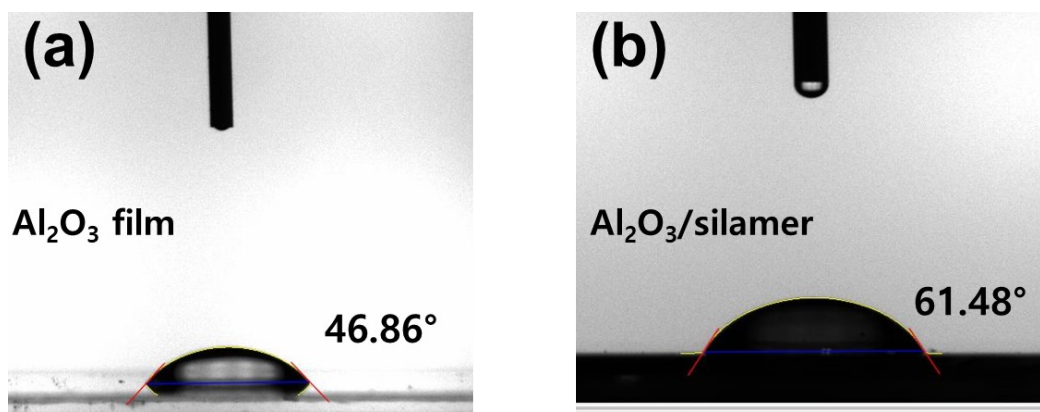

**Figure S7.** Water contact angle measurements on  $\text{Al}_2\text{O}_3$  and  $\text{Al}_2\text{O}_3/\text{silamer}$  surfaces.



**Table S1.** Calculated XRR data of Al<sub>2</sub>O<sub>3</sub> and Al<sub>2</sub>O<sub>3</sub>/silamer before and after the aging test.

| <b>Aging test</b> | <b>Structure</b>                        | <b>Thickness<br/>[nm]</b> | <b>Density<br/>[g/cm<sup>3</sup>]</b> | <b>Roughness<br/>[nm]</b> |
|-------------------|-----------------------------------------|---------------------------|---------------------------------------|---------------------------|
| Before            | Al <sub>2</sub> O <sub>3</sub>          | 65.58                     | 2.84                                  | 0.75                      |
| After             |                                         |                           | Unable to calculate                   |                           |
| Before            | Al <sub>2</sub> O <sub>3</sub> /silamer | 66.19                     | 1.39/2.81                             | 0.53/0.58                 |
| After             |                                         |                           | 65.73                                 | 1.53/2.83                 |

The density and surface roughness of the pure Al<sub>2</sub>O<sub>3</sub> film were 2.84 g/cm<sup>3</sup> and 0.751 nm, respectively. However, the XRR curve of the degraded Al<sub>2</sub>O<sub>3</sub> film changed significantly compared with that of the pure Al<sub>2</sub>O<sub>3</sub> film. Especially, significant changes were observed in the 2-theta region of less than 0.5 degrees with differences in absolute reflectivity values. These changes make it impossible to calculate the density and surface roughness from the XRR graph, implying severe degradation. The thickness, density, and interface roughness of the Al<sub>2</sub>O<sub>3</sub> film protected by the silamer layer showed minimal difference from 66.19 nm, 2.81 g/cm<sup>3</sup>, and 0.58 nm to 65.73 nm, 2.83 g/cm<sup>3</sup>, and 0.99 nm, respectively.

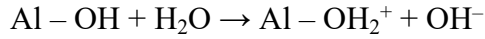

(reaction 1: basification of  $\text{Al}_2\text{O}_3$  surface)

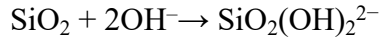

(reaction 2: formation of deprotonated silicic acid)

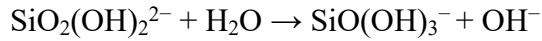

(reaction 3: Protonation of silicic acid)

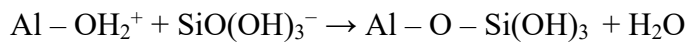

(reaction 4: silicification process at the interface)

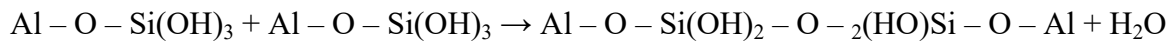

(reaction 5: formation of aluminate phase through condensation reaction)

These five equations explain the formation of the aluminate phase. In Reaction 1, the hydroxide ions are generated as a byproduct of the reaction with water on the surface of  $\text{Al}_2\text{O}_3$  and accelerate the dissolution of  $\text{SiO}_2$ . The primary aluminate phases formed through the silicification reaction between silicic acid and basic aluminum hydroxide were produced through the deprotonation and protonation processes shown in Reactions 3 and 4, respectively. The aluminum hydroxide of the weak base formed through Reaction 1 acted as intermolecular chains between them. Finally, through the condensation reaction, a continuous aluminosilicate layer of Al-O-Si was formed at the interface. Strong interfacial bonding made it possible to address the reliability issue related to the environmental degradation of ALD  $\text{Al}_2\text{O}_3$  films.
